# Supplementary material for: Role of lung ornithine aminotransferase in idiopathic pulmonary fibrosis: regulation of mitochondrial ROS generation and TGF-β1 activity
Source: PubMed Central journal article supplement (PMC10907606; doi:10.1038/s12276-024-01170-w), 2024-02-28
Supplement: 12276_2024_1170_MOESM1_ESM.pdf [file 12276_2024_1170_MOESM1_ESM.pdf]

# **Role of lung ornithine aminotransferase in Idiopathic Pulmonary Fibrosis: regulation of mitochondrial ROS generation and TGF- $\beta$ 1 activity**

Authors: Jong-Uk Lee<sup>1</sup>, Ki Sung Song<sup>1</sup>, Jisu Hong<sup>1</sup>, Hyesun Shin<sup>1</sup>, Eunji Park<sup>1</sup>, Junyeong Baek<sup>1</sup>, Shinhee Park<sup>1</sup>, Ae-Rin Baek<sup>1</sup>, Junehyuk Lee<sup>1</sup>, An Soo Jang<sup>1</sup>, Do Jin Kim<sup>1</sup>, Su Sie Chin<sup>2</sup>, U-Jin Kim<sup>3</sup>, Sung Hwan Jeong<sup>4</sup>, Sung Woo Park<sup>1\*</sup>

<sup>1</sup>Division of Allergy and Respiratory Medicine, Department of Internal Medicine, Soonchunhyang University Bucheon Hospital, 14584, Gyeonggi-Do, South Korea.

<sup>2</sup>Department of Pathology, Soonchunhyang University Bucheon Hospital, 14584, Gyeonggi-Do, South Korea.

<sup>3</sup>Department of Internal Medicine Environmental Health Center Kangwon National University, Gangwondaehakgil, Chuncheon-si, Gangwon-do, South Korea.

<sup>4</sup>Department of Allergy, Pulmonary and Critical Care Medicine, Gachon University, Gil Medical Center, Incheon, South Korea.

## Supplementary information

**Supplementary Table. Clinical characteristics of the patients with IPF classified according to the levels of OAT**

|                           | OAT $\leq$ 75.569 ng/mL (lower) | OAT $>$ 75.569 ng/mL (higher) |
|---------------------------|---------------------------------|-------------------------------|
| No.                       | 43                              | 16                            |
| Age (year)                | 63 (59.22-68.81)                | 64.77 (56.43-68.65)           |
| Male sex                  | 31 (72.1)                       | 9 (56.25)                     |
| Ever Smoker               | 20 (23.3)                       | 2 (12.5)                      |
| BMI, kg/m <sup>2</sup>    | 23.68 (22.19-25.97)             | 25.11 (22.46-26.13)           |
| Follow up duration (year) | 5 (2.51-5)                      | 2.45 (1.11-3.77)              |
| Deaths                    | 6 (14.0)                        | 8 (50.0)                      |
| FVC (% pred)              | 75.5 (65.25-85.25)              | 64 (55.25-74) *               |
| DLCO (% pred)             | 64 (51-73.75)                   | 60 (53-66.5)                  |
| Treatment status          |                                 |                               |
| Anti-fibrotic agents      | 16 (37.2)                       | 4 (25.0)                      |
| Anti-inflammatory agents  | 25 (58.1)                       | 10 (62.5)                     |
| None                      | 10 (23.3)                       | 3 (18.8)                      |
| OAT(ng/mL)                | 38.46 (29.37-49.53)             | 116.79 (87.13-204.11) *       |

Data are presented as median median (25th-75th percentile) or number (%).

\* : P < 0.05 compared with OAT  $\leq$  75.569 ng/mL

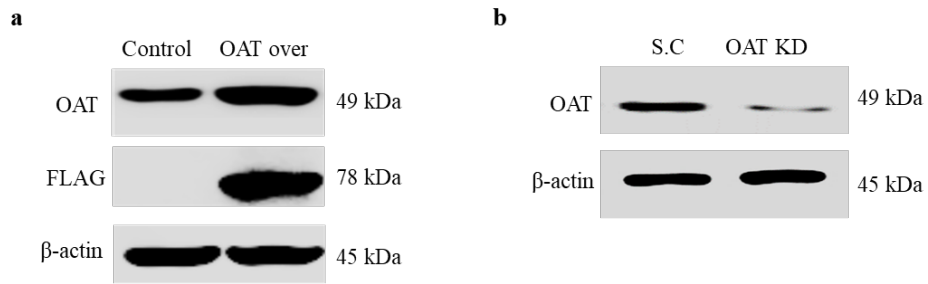

**Supplementary Fig 1. Generation of OAT overexpressing and knockdown stable cells.**

**a.** Overexpression of OAT-FLAG and **b.** OAT knockdown stable cells were confirmed by immunoblotting analysis.

**a**

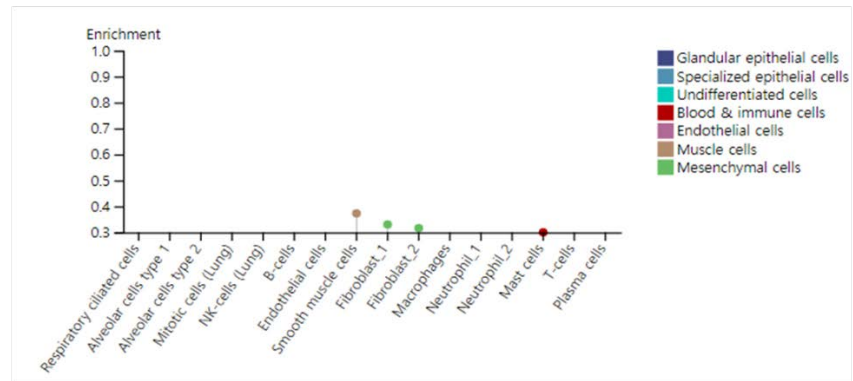

**b**

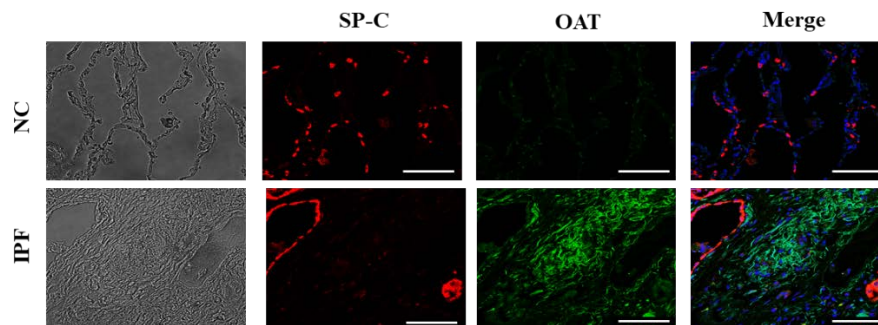

**Supplementary Fig 2. Human protein atlas database analysis and double immunofluorescence staining analysis to identify OAT expression.**

(a) OAT expression atlas of human lung in normal control. (b) Representative double immunofluorescence-stained images of IPF and control lung tissues. OAT and Surfactant protein C (SP-C) were stained using PE- (red) and FITC-conjugated antibodies (green), respectively. A proportion of alveolar type II cells showed staining for both OAT and SP-C (magnification, 400 $\times$ )

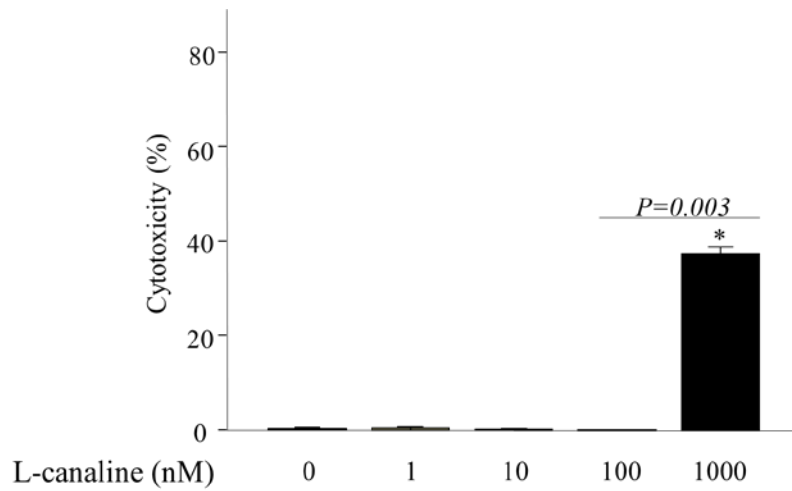

**Supplemental Fig 3. Evaluation of mouse alveolar epithelial cell (C57MG) cytotoxicity at different concentration of L-canaline by the Lactate dehydrogenase (LDH) assay.**

C57MG cells were treated with L-canaline (0-1000 nM) for 24 h in DMEM medium with 0.5% FBS. LDH assay (Cat.88954, Thermo Fisher Scientific, Waltham, MA) followed the manufacturers' instructions. Data are presented as the mean cytotoxicity value  $\pm$  standard deviation from one representative experiment of four independent experiments. \* $P < 0.05$ .

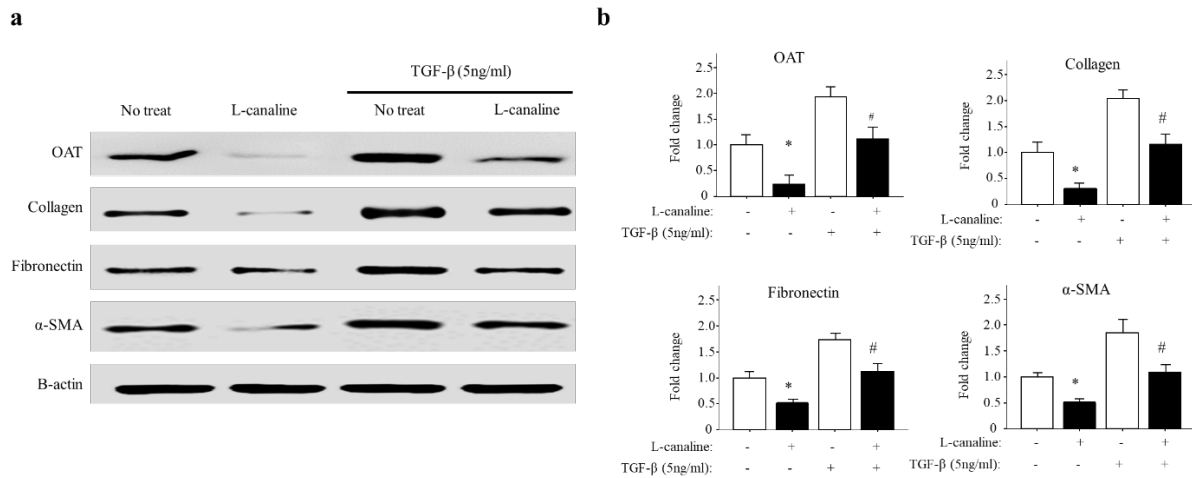

**Supplementary Fig 4. The OAT inhibitor L-canaline suppresses the expression of major components of the extracellular matrix in fibroblasts**

Effect of the OAT inhibitor L-canaline on OAT, collagen, fibronectin, alpha-smooth muscle actin, and MyoD expression in lung fibroblasts. **a.** Protein expression was quantified using immunoblotting and **b.** densitometry ( $n = 4$  per group). \* $p < 0.05$  versus the scramble group, and # $p < 0.05$  versus the L-canaline<sup>+</sup>/scramble group.
